# Supplementary material for: Efficacy and Predictability of Muller's Muscle-conjunctival Resection with Different Tarsectomy Lengths for Unilateral Blepharoptosis Treatment
Source: Research Square preprint supplement (doi:10.21203/rs.3.rs-121908/v1), 2020-12-10
Supplement: Supplementary file 1 [file 887bbfa4119d2f82b6b2c8b3.xlsx]

## Sheet: 工作表1
TABLE 1. Overall data and comparison between group 1 (8-mm MMCR with 1-mm tarsectomy) and group 2 (8-mm MMCR with 2-mm tarsectomy)
	Total cases (mean ± SD)	group 1	group 2	p
Age (years)	54.2±16.5	49.0±16.0	60.0±15.3	0.009
Female (%)	75	78.1	71.4	0.55
Preop MRD1 of ptotic eye(mm)	1.23±0.9	1.58±0.9	0.83±0.8	0.002
Preop MRD1 of healthy eye(mm)	3.21±1.0	3.10±0.9	3.34±1.1	0.327
Postop MRD1 of ptotic eye(mm)	3.38±0.9	3.24±0.9	3.54±0.9	0.194
Postop MRD1 of healthy eye(mm)	3.07±1.0	3.06±1.1	3.09±0.9	0.909
Preop TPS of ptotic eye(mm)	5.36±1.4	4.88±1.3	5.91±1.4	0.007
Preop TPS of healthy eye(mm)	3.20±1.3	3.12±1.5	3.29±1.2	0.639
Postop TPS of ptotic eye(mm)	3.06±1.2	3.04±0.9	3.09±1.5	0.867
Postop TPS of healthy eye(mm)	3.33±1.3	3.27±1.4	3.40±1.3	0.711
Change in MRD1(mm)	2.15±0.8	1.66±0.6	2.72±0.6	<0.001
Postop MRD1 within 1 mm between two eyes (%)	88.3	90.6	85.7	0.554
MRD1, marginal reflex distance 1; Preop, preoperative; Postop, postoperative; TPS, tarsal platform show
